# Supplementary material
Source: publisher figshare collection journal article supplement (https://rs.figshare.com/ndownloader/files/17842622)
Supplement: Supplementary file 1 [file 17842622]

50	0.01	0.3	-1	1	0.03	0.04	0.4	0	5	1	1101	0.023
50	0.01	0.5	-1	1	0.03	0.04	0.4	0.1	5	1	1041.5	0.01198
50	0.99	0.7	-1	1	0.03	0.04	0.4	0.2	5	1	3848.4	0.01467
50	0.99	0.8	-1	1	0.03	0.04	0.4	0.3	5	1	6590.8	0.02519
50	0.99	0.9	-1	1	0.03	0.04	0.4	0.4	5	1	14211	0.03604
50	0.99	0.9	-1	1	0.03	0.04	0.4	0.5	5	1	14832	0.04231
50	0.99	0.99	-1	1	0.03	0.04	0.4	0.6	5	1	80478	0.04468
50	0.99	0.99	-1	1	0.03	0.04	0.4	0.7	5	1	78862	0.044
50	0.99	0.99	-1	1	0.03	0.04	0.4	0.8	5	1	79335	0.04356
50	0.99	0.99	-1	1	0.03	0.04	0.4	0.9	5	1	80007	0.04488
